# Supplementary material for: Biofilm Detection by a Fiber-Tip Ball Resonator Optical Fiber Sensor
Source: MDPI journal article supplement (doi:10.3390/bios12070481), 2022-06-30
Supplement: s1 [file s1]

# Biofilm Detection by a Fiber-Tip Ball Resonator Optical Fiber Sensor

Aida Rakhimbekova <sup>1</sup>, Baizak Kudaibergenov <sup>2</sup>, Damir Moldabay <sup>2</sup>, Albina Zharylgap <sup>2</sup>, Obinna M. Ajunwa <sup>3</sup>, Enrico Marsili <sup>3</sup> and Daniele Tosi <sup>1,4,\*</sup>

<sup>1</sup> School of Engineering and Digital Sciences, Nazarbayev University, Nur-Sultan 010000, Kazakhstan; aida.belova@nu.edu.kz

<sup>2</sup> School of Sciences and Humanities, Nazarbayev University, Nur-Sultan 010000, Kazakhstan; baizak.kudaibergenov@alumni.nu.edu.kz (B.K.); damir.moldabay@nu.edu.kz (D.M.); albina.zharylgap@nu.edu.kz (A.Z.)

<sup>3</sup> Department of Chemical and Materials Engineering, School of Engineering and Digital Sciences, Nazarbayev University, 53 Kabanbay Batyr Ave., Nur-Sultan 010000, Kazakhstan; obinna.ajunwa@nu.edu.kz (O.M.A.); enrico.marsili@nu.edu.kz (E.M.)

<sup>4</sup> National Laboratory Astana, Laboratory of Biosensors and Bioinstruments, Nur-Sultan 010000, Kazakhstan

\* Correspondence: daniele.tosi@nu.edu.kz

## Supplementary Materials

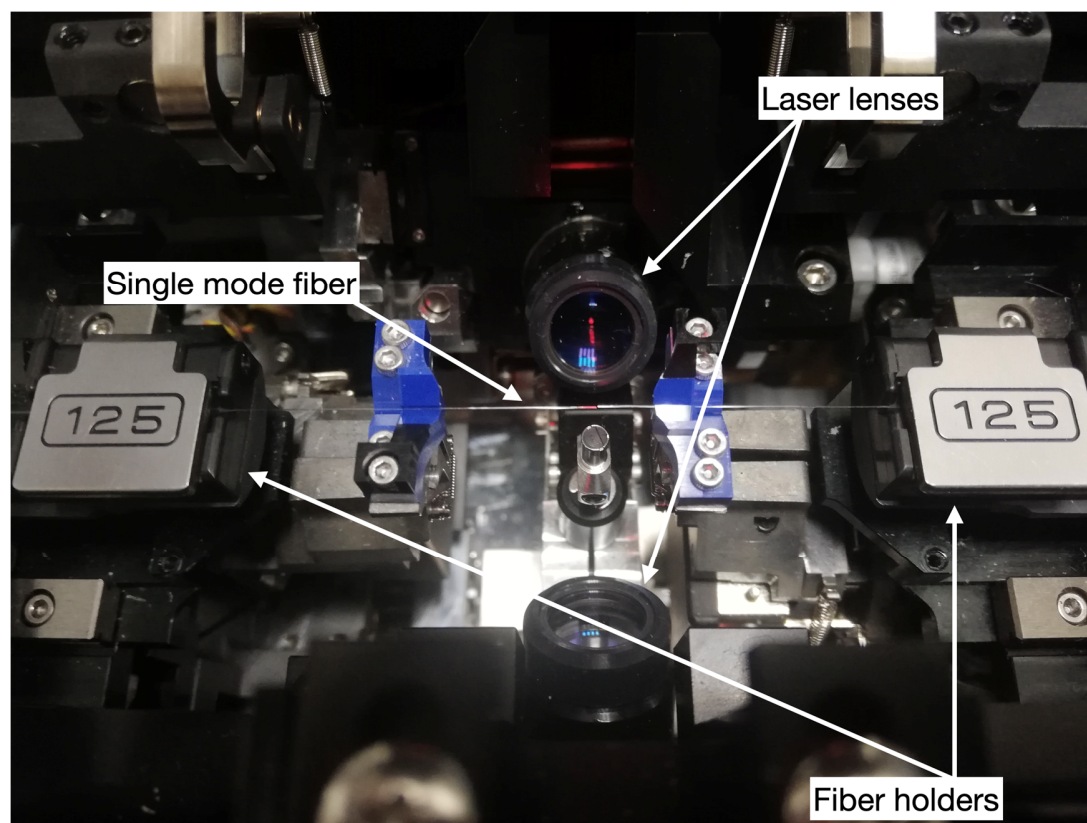

**Figure S1.** Ball resonator fabrication by CO<sub>2</sub> laser.

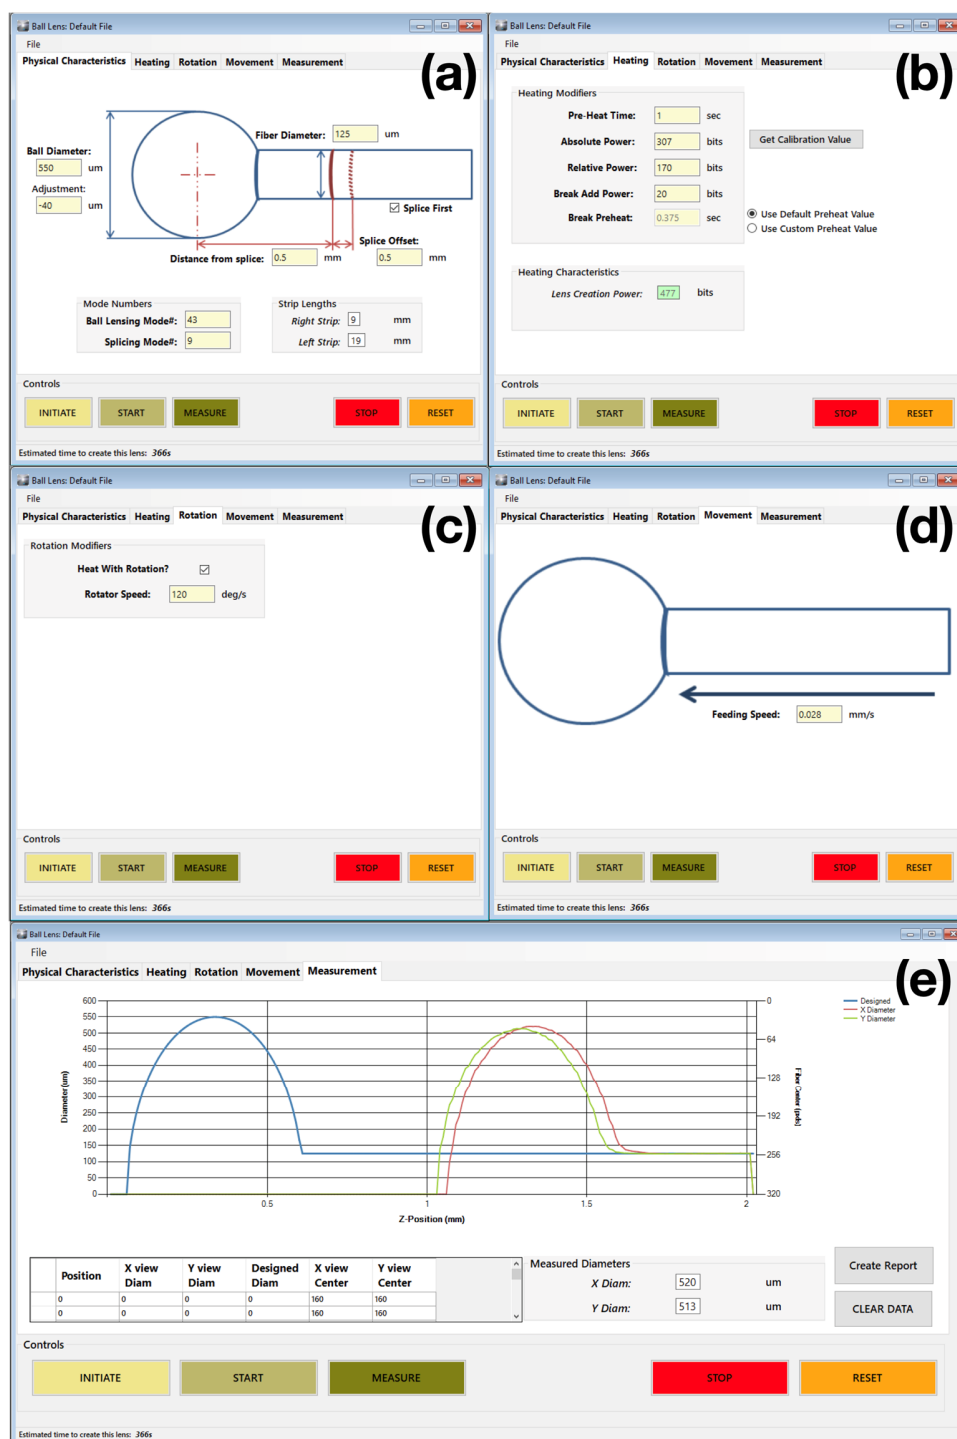

**Figure S2.** Settings of ball resonators manufacture: (a) Physical characteristics settings; (b) Heating settings; (c) Rotation settings; (d) Movement settings; (e) Measurements of fabricated ball resonators.

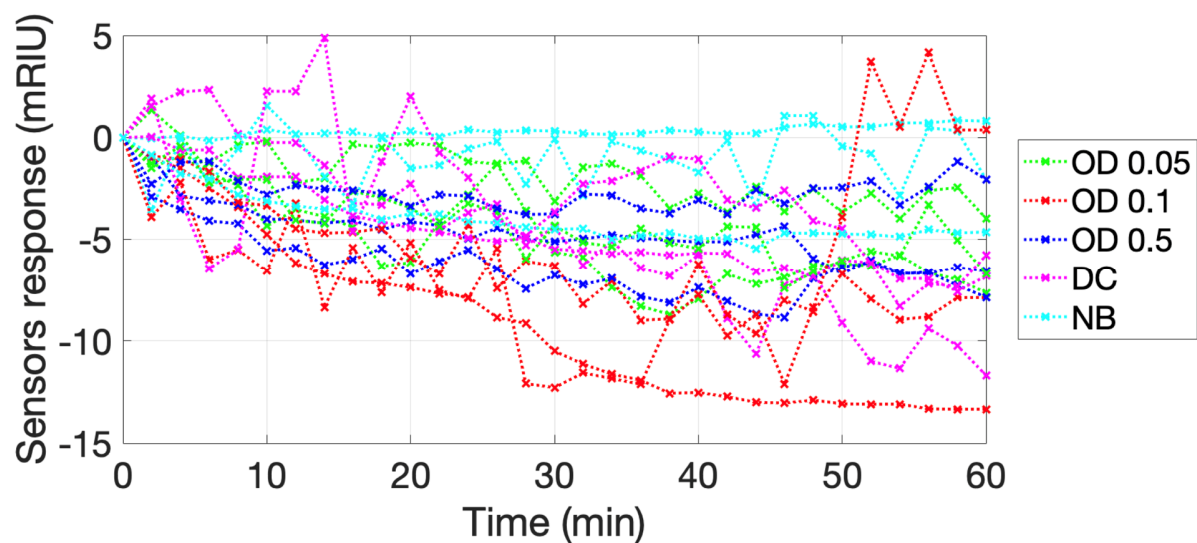

Figure S3. View of all response of all experiments over time.

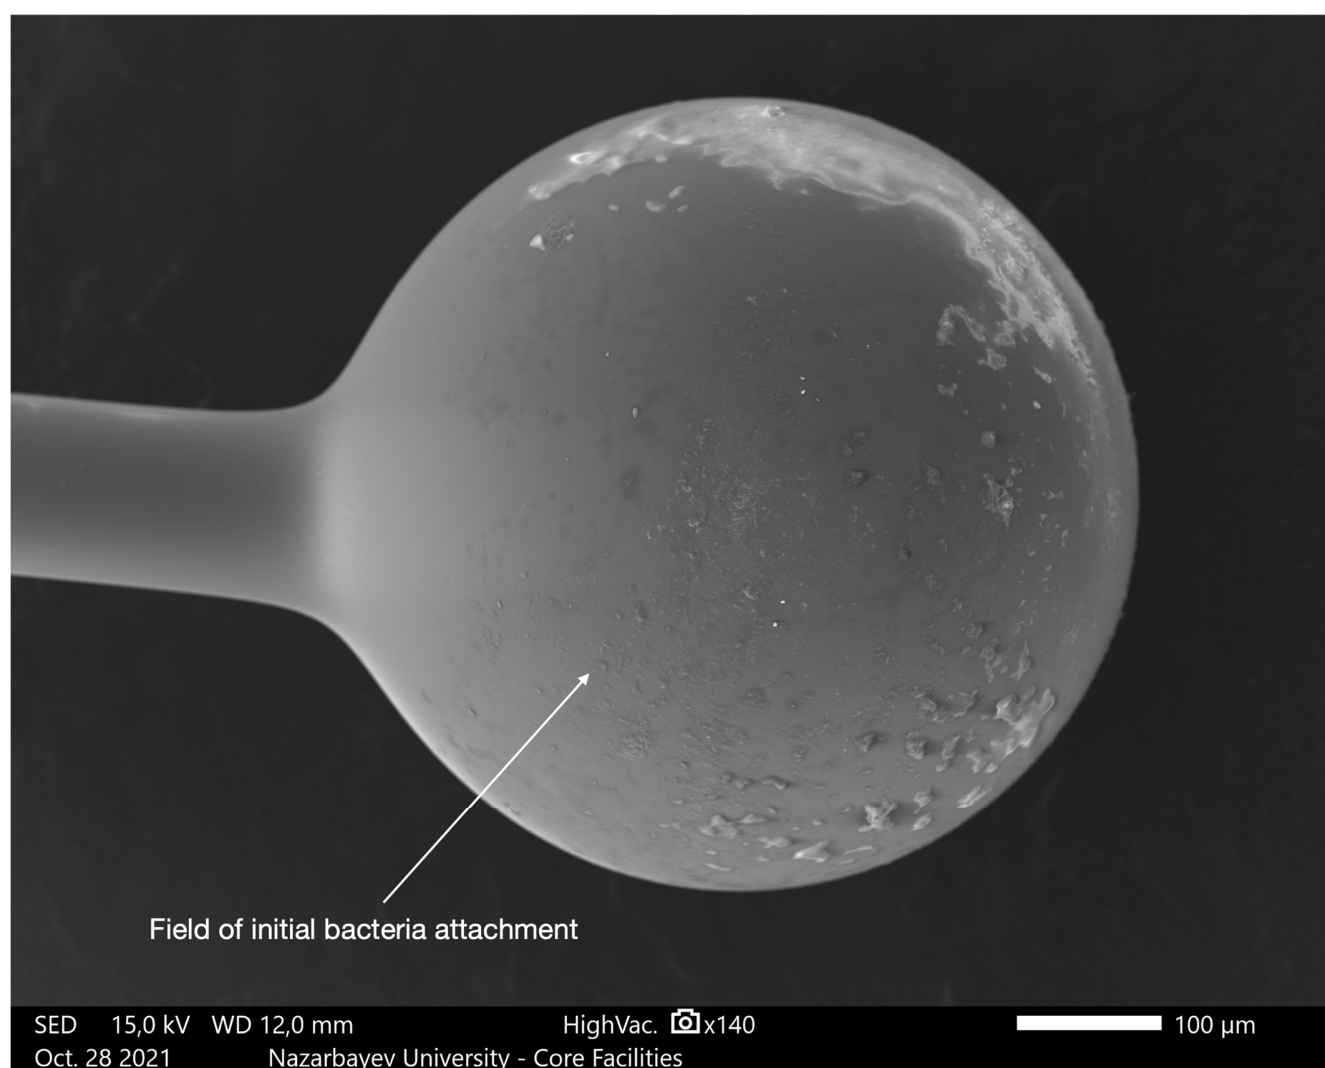

Figure S4. Scanning electron microscopy of OD=0.5 sample. The fealds of bacteria initial attachments are seen.

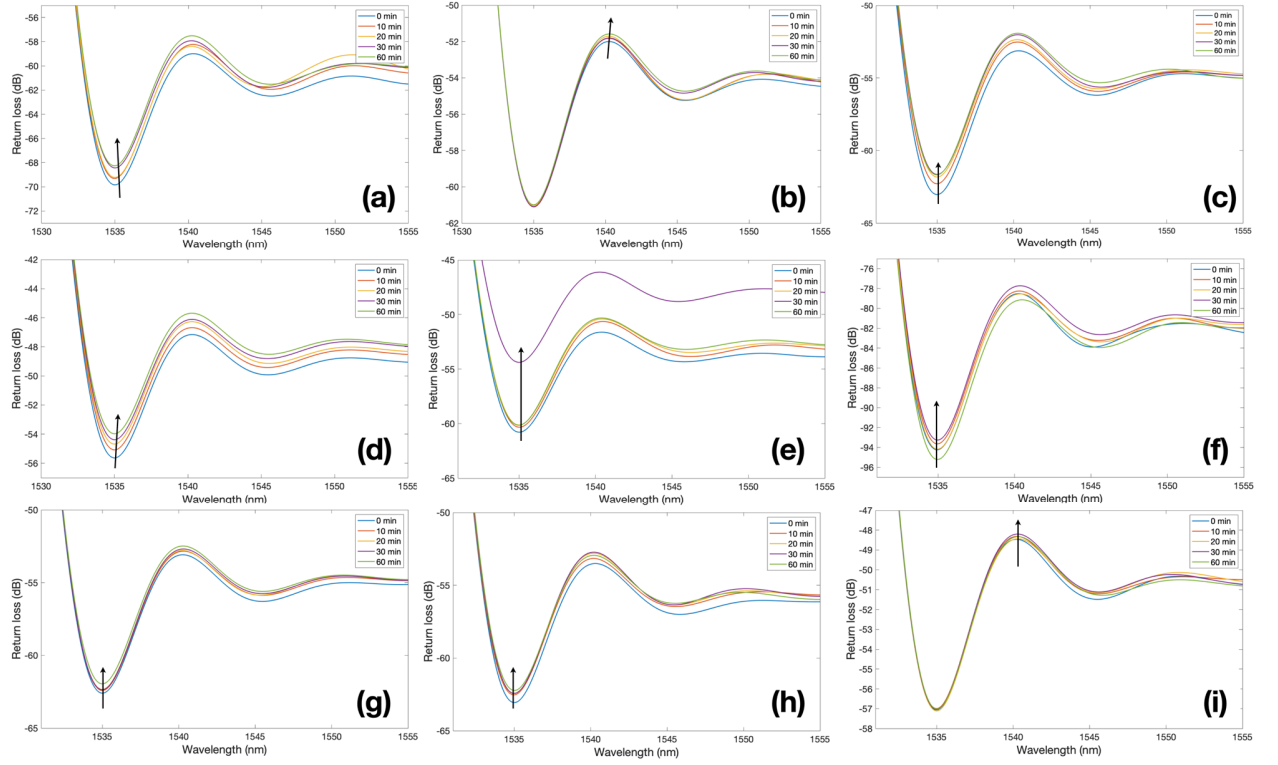

**Figure S5.** Spectra of ball resonators: (a)-(c) ball resonators used for OD=0.05 experiment with diameters 535-541  $\mu\text{m}$ , 541-534  $\mu\text{m}$ , 526-521  $\mu\text{m}$  respectively; (d)-(f) ball resonators used for OD=0.1 experiment with diameters 569-561  $\mu\text{m}$ , 544-538  $\mu\text{m}$ , 543-539  $\mu\text{m}$  respectively; (g)-(i) ball resonators used for OD=0.05 experiment with diameters 532-523  $\mu\text{m}$ , 523-521  $\mu\text{m}$ , 520-513  $\mu\text{m}$  respectively.

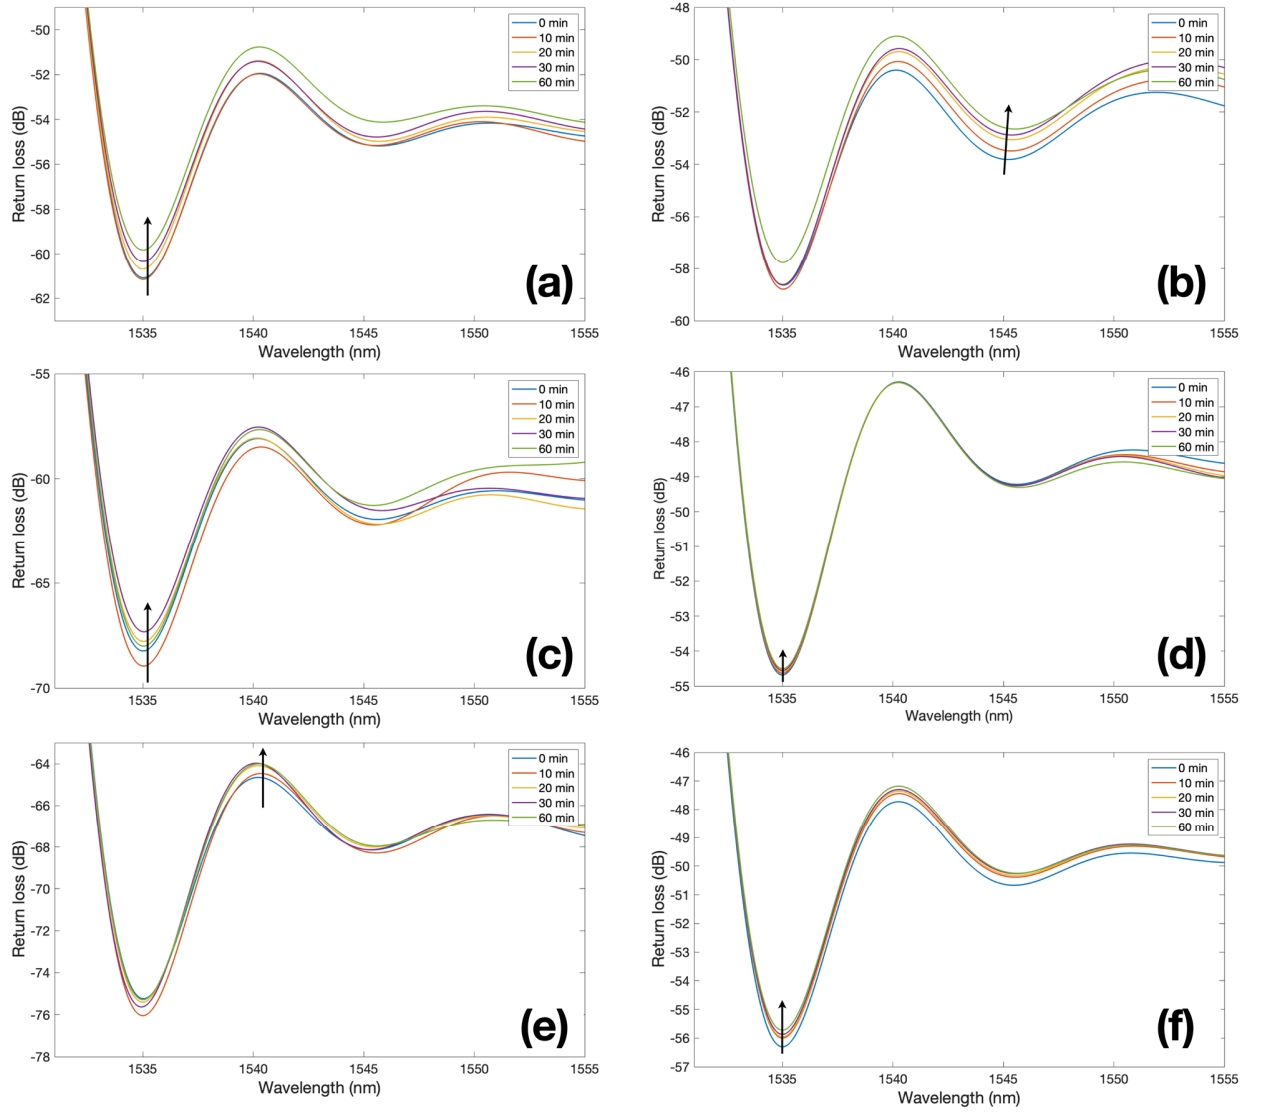

**Figure S6. Spectra of ball resonators used for controls:** (a)-(c) ball resonators used for control DC with diameters 565-559  $\mu\text{m}$ , 567-564  $\mu\text{m}$ , 571-564  $\mu\text{m}$  respectively; (d)-(f) ball resonators used for control NB with diameters 568-561  $\mu\text{m}$ , 569-563  $\mu\text{m}$ , 570-564  $\mu\text{m}$  respectively.

**Table S1.** Size and sensitivity of all BRs used in experiments (NB – nutrient broth, DC – dead cells, bacteria OD=0.5, OD=0.1, OD=0.05).

| #  | Diametr (um) | Analyte | Sensitivity (dB/RIU) | R2   | At the wavelength (nm) | Corresponding to the index | Experiment |
|----|--------------|---------|----------------------|------|------------------------|----------------------------|------------|
| 1  | 573-565      | NB      | -90,59               | 1,00 | 1 552,83               | 9 364,55                   | NB         |
| 2  | 568-561      | NB      | -108,38              | 1,00 | 1 552,75               | 9 321,82                   | NB         |
| 3  | 569-563      | NB      | -92,26               | 0,95 | 1 573,42               | 21 463,19                  | NB         |
| 4  | 532-523      | 0,5     | -104,46              | 0,97 | 1 552,98               | 9 453,06                   | DC         |
| 5  | 523-521      | 0,5     | -96,41               | 0,98 | 1 571,60               | 20 407,15                  | DC         |
| 6  | 520-513      | 0,5     | -98,66               | 0,95 | 1 553,14               | 9 553,78                   | DC         |
| 7  | 535-541      | 0,05    | -127,52              | 0,98 | 1 552,85               | 9 379,81                   | OD=0.05    |
| 8  | 541-534      | 0,05    | -128,37              | 0,98 | 1 552,55               | 9 202,78                   | OD=0.05    |
| 9  | 526-521      | 0,05    | -122,32              | 0,97 | 1 580,55               | 25 577,46                  | OD=0.05    |
| 10 | 569-561      | 0,1     | -106,03              | 0,99 | 1 552,88               | 9 398,12                   | OD=0.1     |
| 11 | 544-538      | 0,1     | -144,28              | 0,99 | 1 565,42               | 16 799,54                  | OD=0.1     |
| 12 | 543-539      | 0,1     | -101,64              | 0,95 | 1 570,99               | 20 050,05                  | OD=0.1     |
| 13 | 565-559(1)   | DC      | -90,71               | 1,00 | 1 552,91               | 9 413,38                   | OD=0.5     |
| 14 | 567-564      | DC      | -170,43              | 0,95 | 1 551,64               | 8 656,45                   | OD=0.5     |
| 15 | 571-564      | DC      | -115,24              | 0,99 | 1 582,89               | 26 923,45                  | OD=0.5     |
